# Supplementary material for: Soluble ST2 and All-Cause Mortality in Patients with Chronic Obstructive Pulmonary Disease—A 10-Year Cohort Study
Source: MDPI journal article supplement (doi:10.3390/jcm11010056), 2021-12-23
Supplement: s1 [file s1]

## Supplementary Material

**Table S1. Univariate correlations between sST2 and selected variables in the total sample, in patients with stable COPD and exacerbated COPD.**

|                        | Total sample |         | Stable COPD |         | AE COPD |         |
|------------------------|--------------|---------|-------------|---------|---------|---------|
|                        | coef.        | p-value | coef.       | p-value | coef.   | p-value |
| Age, years             | 0.097        | 0.296   | 0.086       | 0.528   | 0.044   | 0.830   |
| BMI, kg/m <sup>2</sup> | -0.152       | 0.101   | -0.040      | 0.772   | -0.467  | 0.016   |
| Heart rate, bpm        | 0.224        | 0.016   | 0.124       | 0.366   | 0.101   | 0.638   |
| Systolic BP, mmHg      | 0.210        | 0.023   | -0.421      | 0.001   | -0.252  | 0.25    |
| Diastolic BP, mmHg     | 0.078        | 0.403   | 0.071       | 0.606   | -0.092  | 0.660   |
| Pack-years             | 0.367        | 0.000   | 0.126       | 0.347   | 0.013   | 0.951   |
| FEV1, %predicted       | -0.417       | 0.000   | -0.250      | 0.063   | -0.588  | 0.002   |
| TLC, L                 | 0.413        | 0.000   | 0.207       | 0.146   | 0.262   | 0.226   |
| RV_TLC, ratio          | 0.355        | 0.000   | 0.165       | 0.248   | 0.380   | 0.070   |
| 6MWT, meters           | 0.450        | 0.000   | -0.466      | 0.001   | 0.066   | 0.614   |
| Neutrophils, G/L       | 0.321        | 0.000   | 0.290       | 0.034   | 0.155   | 0.449   |
| CRP, mg/L              | 0.261        | 0.000   | -0.055      | 0.687   | 0.305   | 0.130   |
| Creatinine, mg/dl      | 0.112        | 0.228   | -0.036      | 0.794   | 0.099   | 0.630   |
| BUN, U/L               | 0.032        | 0.729   | -0.377      | 0.012   | -0.127  | 0.537   |
| LDH, U/L               | 0.300        | 0.001   | 0.149       | 0.278   | 0.400   | 0.052   |
| Cholesterol, mg/dl     | -0.208       | 0.024   | -0.261      | 0.054   | -0.201  | 0.303   |
| Triglyceride, mg/dl    | 0.027        | 0.771   | -0.087      | 0.529   | -0.330  | 0.099   |
| HbA1c, %               | 0.097        | 0.314   | 0.110       | 0.433   | -0.202  | 0.393   |

Abbreviations: COPD, chronic obstructive pulmonary disease; AE COPD, acute exacerbation of chronic obstructive pulmonary disease; BMI, body mass index; HR, heart rate; BP, blood pressure; FEV1,% pred., forced expiratory volume in 1 second percentage predicted; TLC, total lung capacity; RV/TLC ratio, residual volume/total lung capacity; 6MWT, 6 minute walk test; CRP, C-reactive protein; BUN, blood urea nitrogen; LDH, lactate dehydrogenase; HbA1c, glycated hemoglobin.
